# Supplementary material for: A polyamino acid with zincophilic chains enabling high-performance Zn anodes
Source: Royal Society of Chemistry journal article supplement (doi:10.1039/d2ta05528g), 2022-01-01
Supplement: d2ta05528g1.pdf [file d2ta05528g1.pdf]

## Supporting Information

### **Polyamino acid with zinephilic chains enabling high-performance Zn anode**

Jiaying Liu,<sup>a,b</sup> Weihao Song,<sup>a,b</sup> Yili Wang,<sup>a,b</sup> Shuaize Wang,<sup>a,b</sup> Tianren Zhang,<sup>c</sup>  
Yinliang Cao,<sup>c</sup> Shuguo Zhang,<sup>c</sup> Chunchuan Xu,<sup>c</sup> Yongzheng Shi,<sup>a,b</sup> Jin Niu,<sup>a,b,\*</sup> Feng  
Wang<sup>a,b,\*</sup>

<sup>a</sup> State Key Laboratory of Chemical Resource Engineering, Laboratory of Electrochemical Process and Technology for materials, Beijing University of Chemical Technology, Beijing, 100029, P. R. China

<sup>b</sup> Beijing Advanced Innovation Center for Soft Matter Science and Engineering, Beijing University of Chemical Technology, Beijing, 100029, P. R. China

<sup>c</sup> Tianneng Battery Group Co.,Ltd. Zhejiang, 313100, P. R. China

## **Material Characterization**

The morphology of materials and anodes were characterized by SEM (JEOL, JSM-6701F) and EDS were used to determine the elemental distribution of the Zn-anode surface. XRD patterns were recorded on a SHIMADZU XRD diffrac-7000 X-RAY diffractometer. Raman spectra were characterized using a LabRam HR800 spectrometer. FTIR spectra were measured by a PerkinElmer Spectrum 100 spectrometer. The surface chemical compositions of the materials were analyzed by XPS (ESCALAB 250). In-situ optical microscopy analyses were carried on an optical microscope (XJ-550) with an electrolytic cell (Beijing Science Star Technology). Hydrogen evolution was quantified by in-situ electrochemical gas chromatography (SHIMADZU GC-2030). The sessile drop contact angle was measured on a contact angle measuring instrument (DataPhysics OCA20).

## **DFT calculations**

The DFT calculation was performed by the Vienna Ab-initio Simulation Package (VAA), and the exchange-correlation energy was approximately described by the Perdew-Burke-Ernzerhof (PBE) functional based on the generalized gradient approximation (GGA) [S1]. In all calculation, a cutoff energy with the value of 400 eV was used for the plane wave basis, and the convergence criteria for the ionic relaxation and the electronic self-consistent calculation were set to 0.02 eV  $\text{\AA}^{-1}$  and  $10^{-5}$  eV, respectively. The long-range dispersion correction for the van der Waals interaction was implemented through the DFT-D3 method in all calculation. It should be noted that a trimer was used to represent PAA for calculation.

## **Electrochemical measurements**

Zn symmetric cells were assembled by sandwiching the glass fiber separator between commercial Zn plates in CR2032-type cells filled with different electrolytes. Coulombic efficiency was measured in the Zn-Cu half cells, which were assembled using Cu plate as working electrode, Zn plate as counter electrode, and glass fiber as separator, respectively. The Zn-MnO<sub>2</sub> full cells (including coin cell and pouch cell) were assembled using Zn anode and MnO<sub>2</sub> cathode. The diameter of the Zn plates is 10 mm with a thickness of 100  $\mu\text{m}$ . Before use, the Zn plates were polished using

sandpapers (1000 mesh and 2000 mesh), followed by water/ethanol washing for several times. The electrolyte amount for the half cell and full cell were 100  $\mu\text{L}$  and  $\sim 15 \mu\text{L}$   $\text{mg}^{-1}$  (based on the weight of cathode materials), respectively. The cathode was prepared by mixing  $\text{MnO}_2$  nanorods (Fig. S8, S9), acetylene black, and polyvinylidene fluoride in a weight ratio of 7: 2: 1 with N-methyl-2-pyrrolidone as a solvent. The obtained slurry was cast onto a Ti foil, followed by drying at 120  $^\circ\text{C}$  for 16 h under vacuum. The loading weight of the cathode is  $\sim 3 \text{ mg cm}^{-2}$ .

Tafel plot, LSV, CA, and CV measurements were performed using Zn plates as both the working electrode and the counter electrode, and Ag/AgCl electrode as the reference electrode, respectively. The Tafel plots were measured by scanning between  $-0.6 \text{ V}$  and  $-1.6 \text{ V}$  at  $10 \text{ mV s}^{-1}$ . The chronoamperometry were measured at a fixed overpotential of  $-150 \text{ mV}$ .

For the in-situ electrochemical gas chromatography, a two-neck bottle with two Zn electrodes was applied for measurement (Fig. S22).  $\text{N}_2$  was passed into the two-neck bottle to take out the produced gas. The gas chromatography was used to quantitatively determine the real-time hydrogen production by controlling the same gas inlet flow and sampling time.

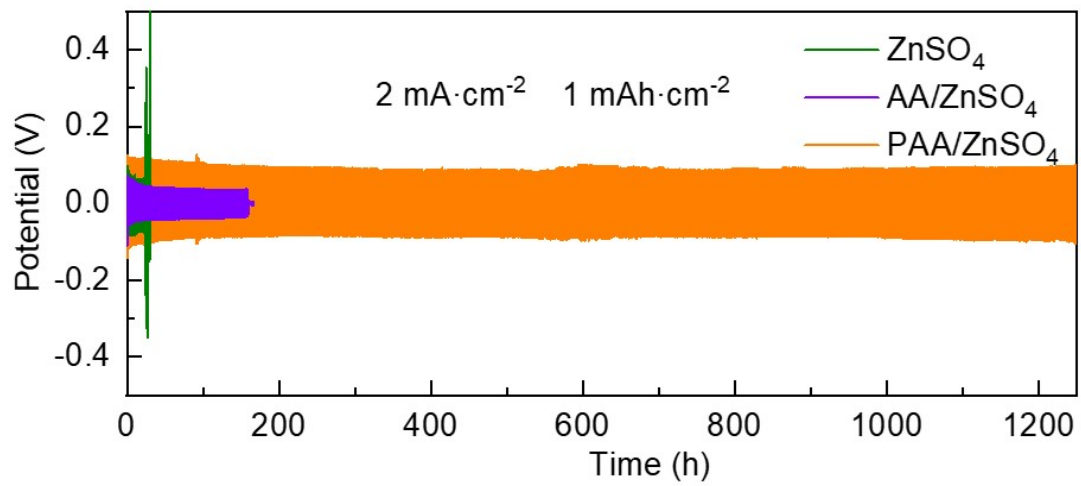

**Fig. S1.** The voltage profiles of the Zn|Zn cells tested in the ZnSO<sub>4</sub>, AA/ZnSO<sub>4</sub>, and PAA/ZnSO<sub>4</sub> electrolytes at the current density of 2 mA cm<sup>-2</sup> with the capacity of 1 mAh cm<sup>-2</sup>.

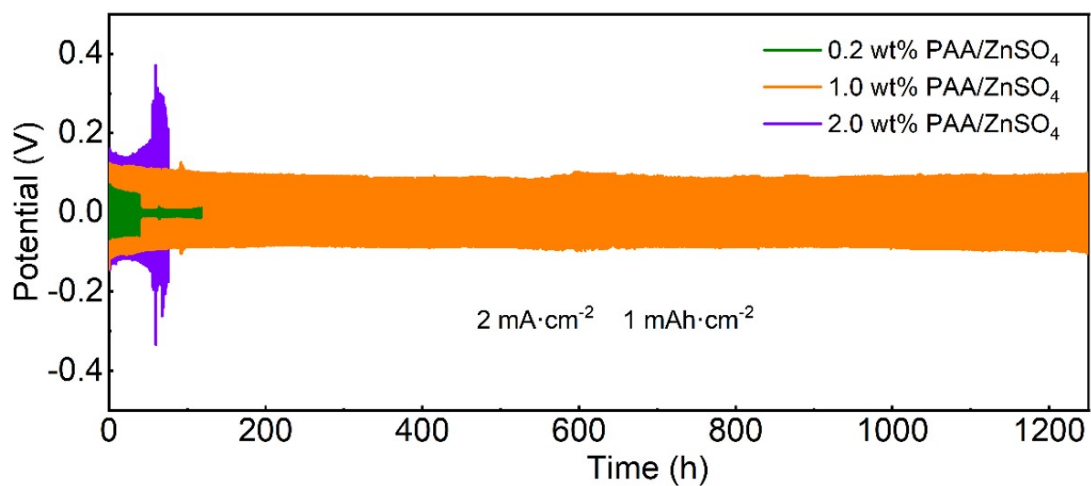

**Fig. S2.** The voltage profiles of the Zn|Zn cells tested in the PAA/ZnSO<sub>4</sub> electrolytes with different amount of PAA at the current density of 2 mA cm<sup>-2</sup> with the capacity of 1 mAh cm<sup>-2</sup>.

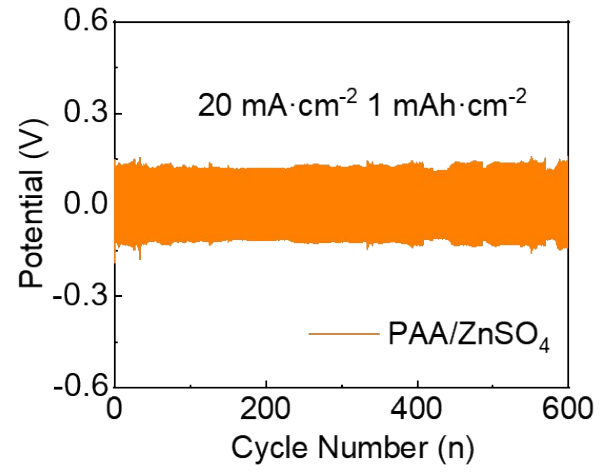

**Fig. S3.** The voltage profile of the Zn|Zn cell tested in the PAA/ZnSO<sub>4</sub> electrolyte at the current density of  $20 \text{ mA cm}^{-2}$  with the capacity of  $1 \text{ mAh cm}^{-2}$ .

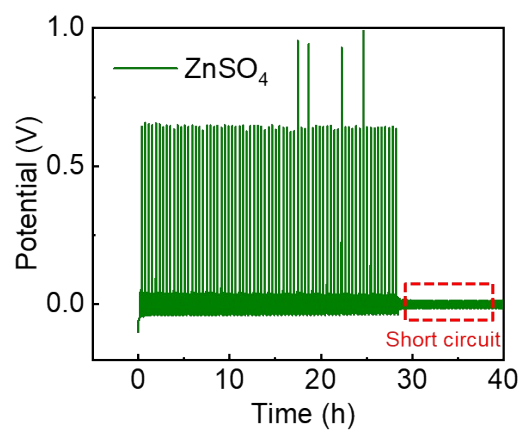

**Fig. S4.** The potential-time curve of Zn|Cu cell tested in ZnSO<sub>4</sub> electrolyte at the current density of 10 mA cm<sup>-2</sup> with the capacity of 2 mAh cm<sup>-2</sup>

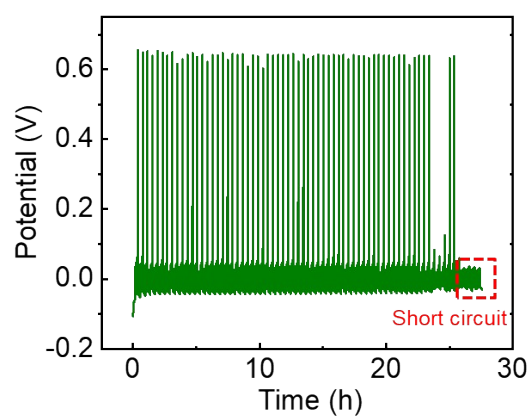

**Fig. S5** The potential-time curve of Zn|Cu cell tested in AA/ZnSO<sub>4</sub> electrolyte at the current density of 10 mA cm<sup>-2</sup> with the capacity of 2 mAh cm<sup>-2</sup>.



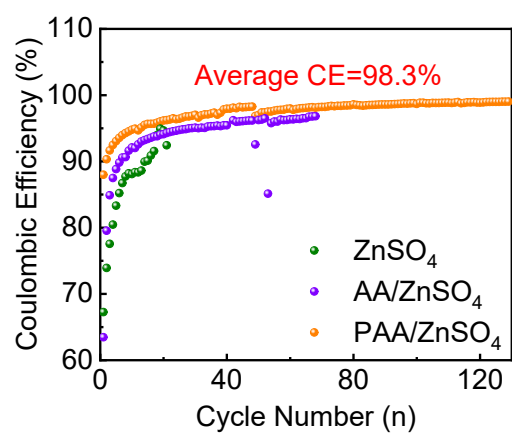

**Fig. S6.** The coulombic efficiency of the Zn|Cu half cells using the ZnSO<sub>4</sub>, AA/ZnSO<sub>4</sub>, and PAA/ZnSO<sub>4</sub> electrolytes at the current density of 2 mA cm<sup>-2</sup> with the capacity of 1 mAh cm<sup>-2</sup>.

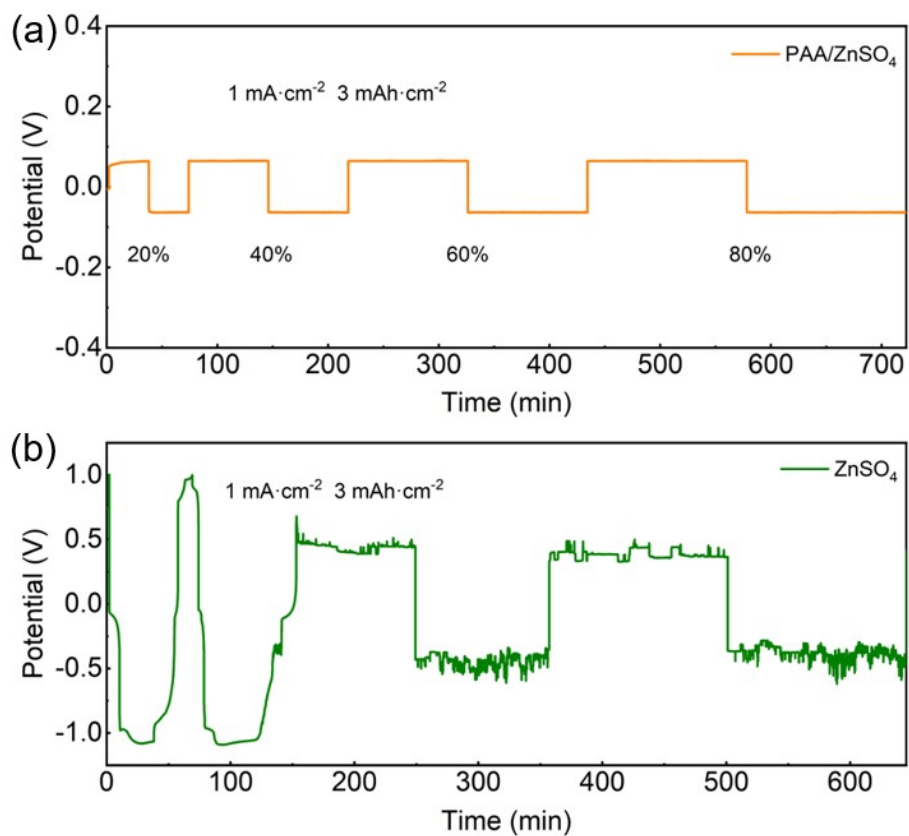

**Fig. S7.** The charge/discharge profiles of the Zn|Zn cells in the (a) PAA/ZnSO<sub>4</sub> and (b) ZnSO<sub>4</sub> electrolytes under different depth-of-discharge.

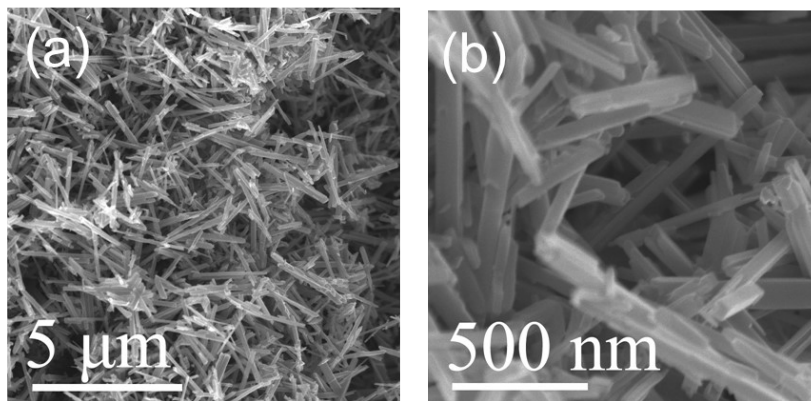

**Fig. S8.** The SEM images of MnO<sub>2</sub> nanorods.

For the preparation of MnO<sub>2</sub> nanorods, 6 mmol KMnO<sub>4</sub> was dissolved in 60 mL deionized water and then 20 mmol concentrated HCl was slowly added into the solution under vigorous stirring. The resultant transparent purple solution was transferred into a 100 mL Teflon-lined stainless-steel autoclave. The sealed autoclave was heated to 140 °C and maintained for 12 h.

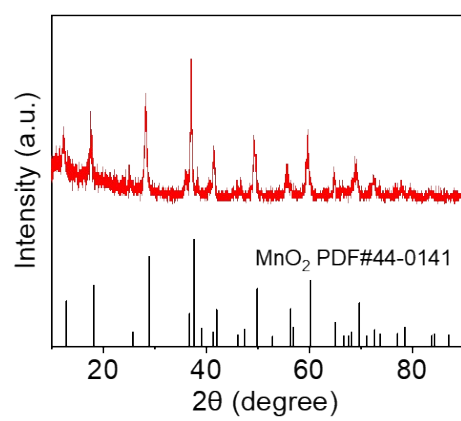

**Fig. S9.** The XRD pattern of MnO<sub>2</sub> nanorods.

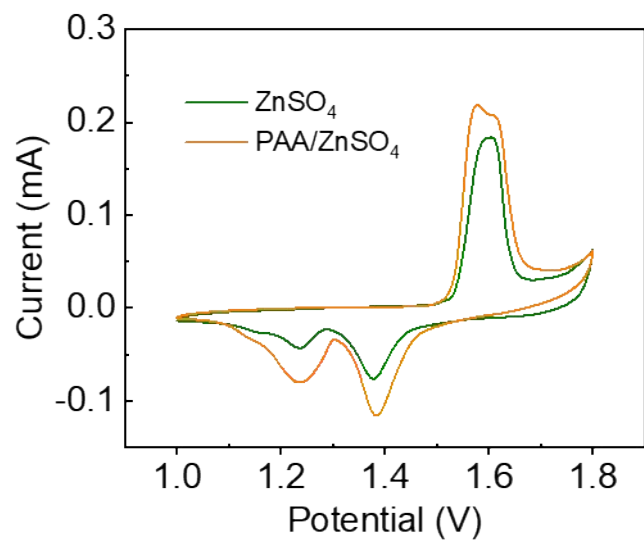

**Fig. S10.** The CV curves of the Zn-MnO<sub>2</sub> full cells using the PAA/ZnSO<sub>4</sub> electrolyte and ZnSO<sub>4</sub> electrolyte.

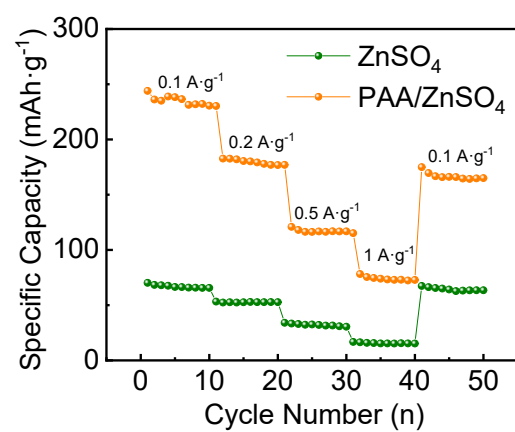

**Fig. S11.** Rate performance of the Zn-MnO<sub>2</sub> full cells after 100 cycles at 0.2 A g<sup>-1</sup> using the PAA/ZnSO<sub>4</sub> electrolyte and ZnSO<sub>4</sub> electrolyte.

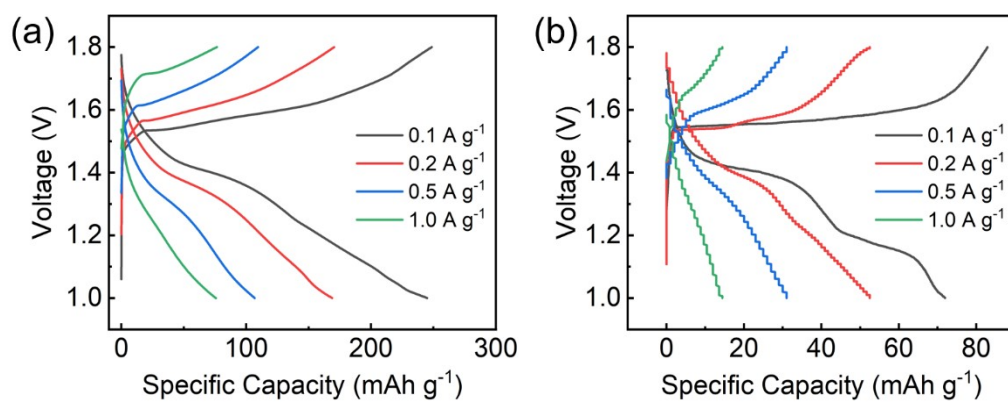

**Fig. S12.** The charge/discharge profiles of the Zn/MnO<sub>2</sub> cells in the (a) PAA/ZnSO<sub>4</sub> and (b) ZnSO<sub>4</sub> electrolytes.

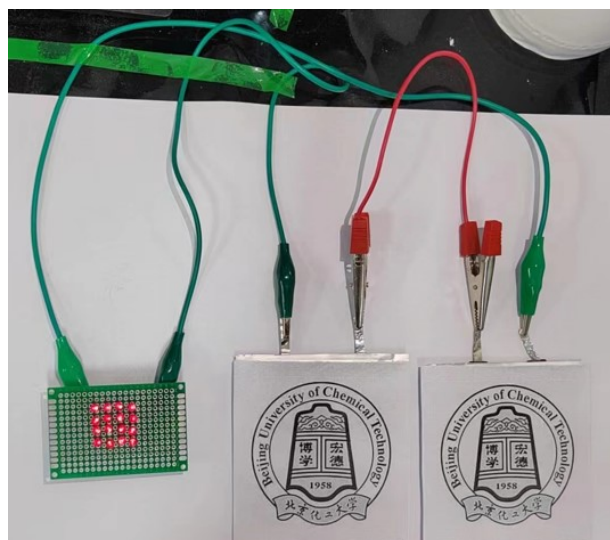

**Fig. S13.** The connection between the pouch cells and the LEDs.



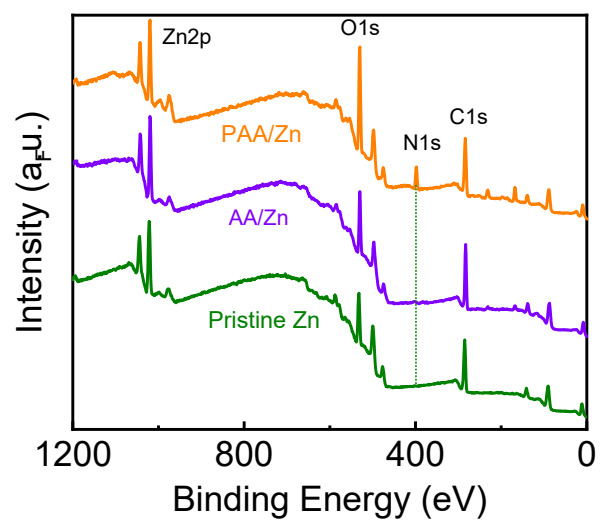

**Fig. S14.** The XPS spectra of pristine Zn anode and Zn anodes after 10 cycles in the PAA and AA additives.

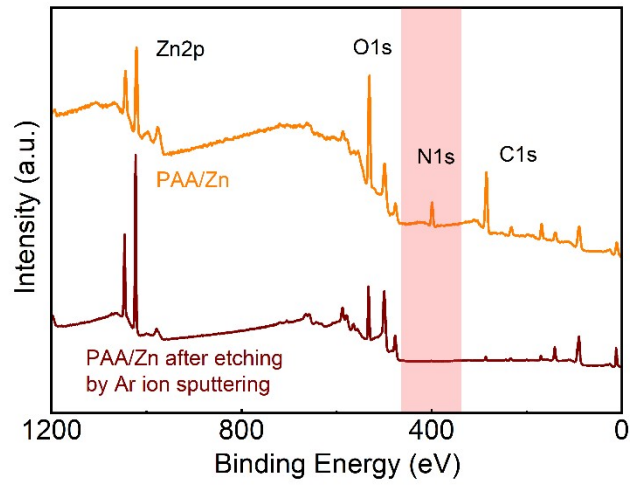

**Fig. S15.** XPS spectra of the cycled Zn anode (with a plating capacity of  $1 \text{ mAh cm}^{-2}$ ) in the PAA/ZnSO<sub>4</sub> electrolyte before and after etching by Ar ion sputtering.

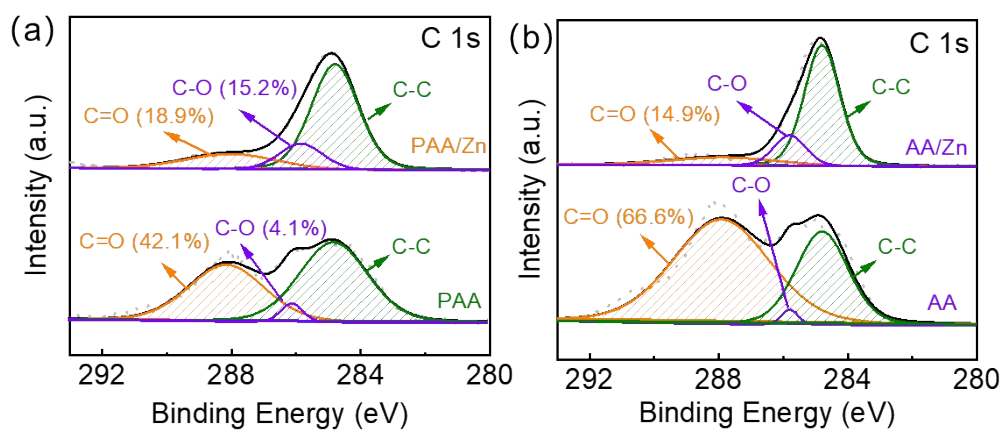

**Fig. S16.** The high-resolution C1s XPS spectra for (a) PAA and PAA/Zn, (b) AA and AA/Zn.

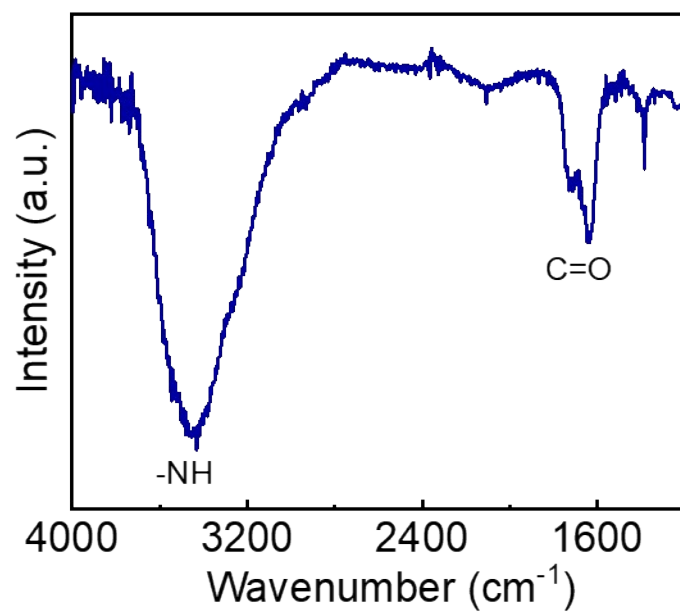

**Fig. S17.** The FTIR spectrum of PAA.

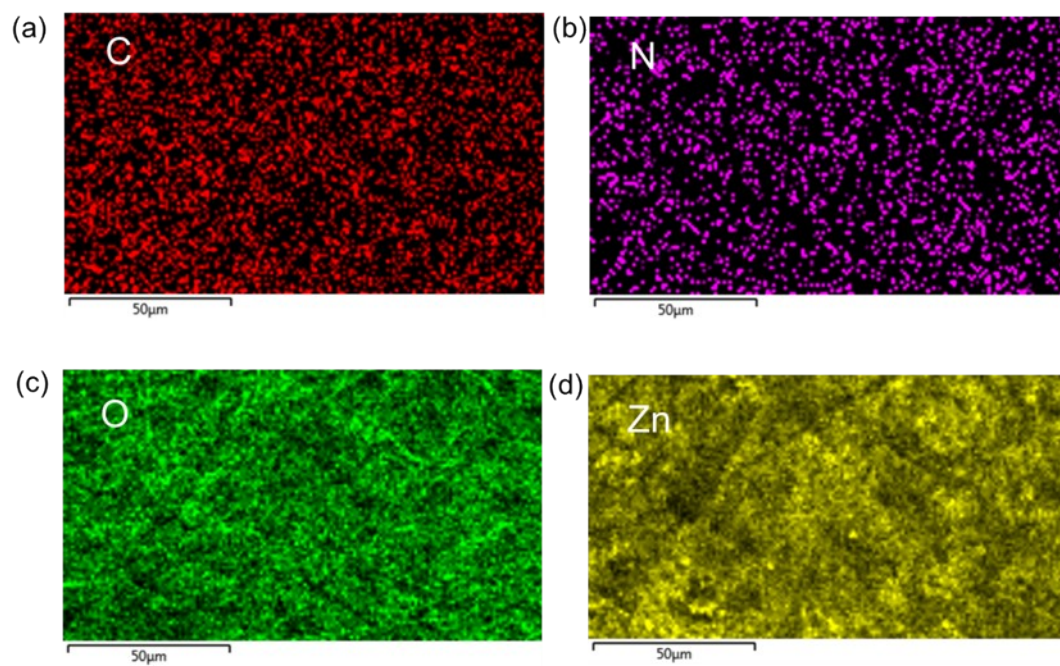

**Fig. S18.** The mapping images using the X-ray energy dispersive spectroscopy of PAA/Zn.

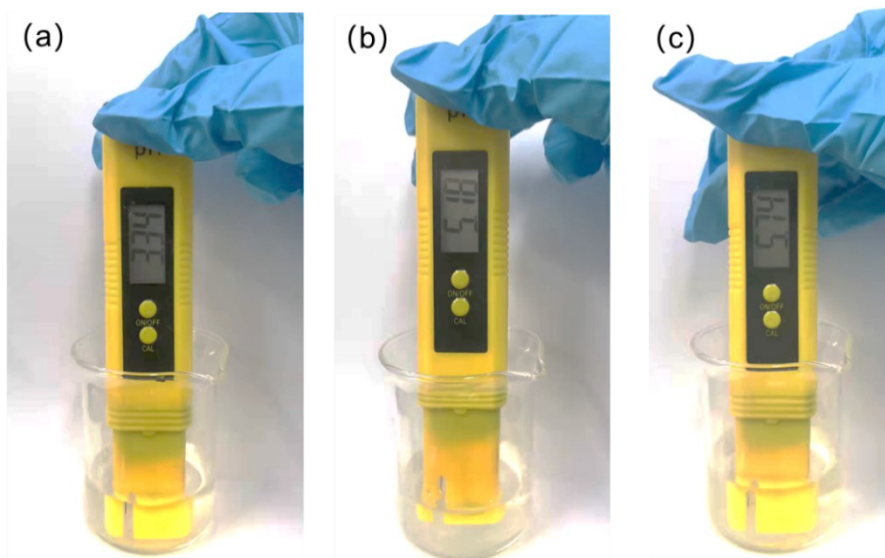

**Fig. S19.** The pH of the (a) AA/ZnSO<sub>4</sub>, (b) PAA/ZnSO<sub>4</sub>, and (c) 2 M ZnSO<sub>4</sub> electrolytes.

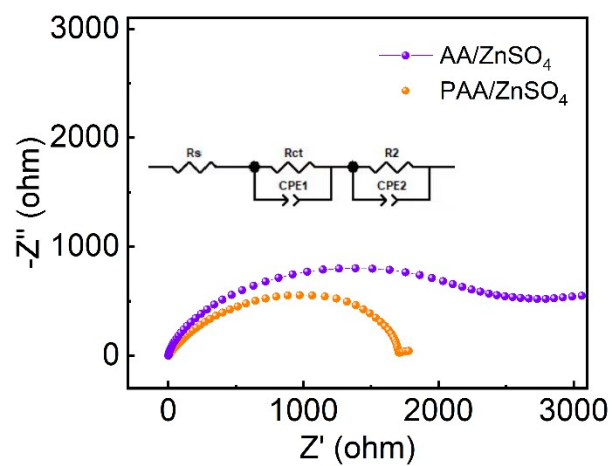

**Fig. S20.** The electrochemical impedance spectroscopy results of the Zn|Zn cells tested in the PAA/ZnSO<sub>4</sub> and AA/ZnSO<sub>4</sub> electrolytes (inset: equivalent circuit for fitting).

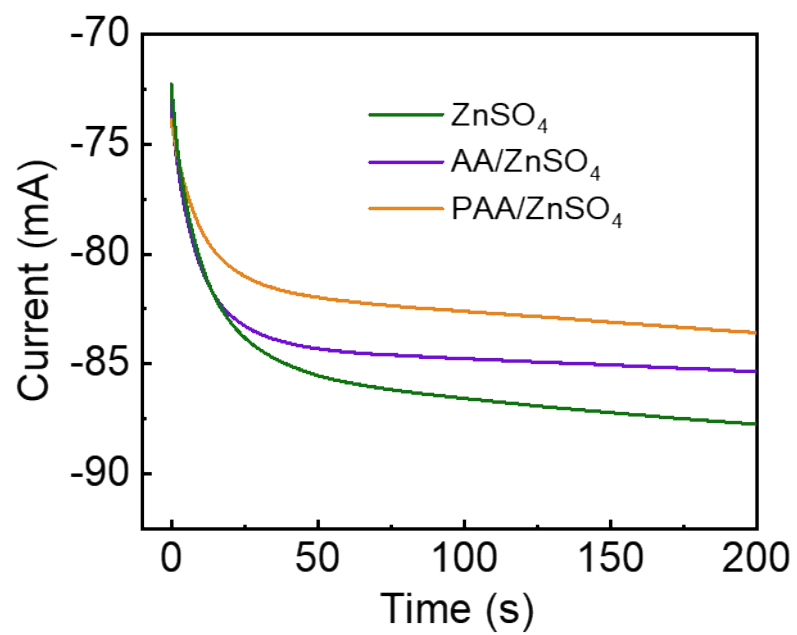

**Fig. S21.** The potentiostatic current-time transient curve of Zn plate tested in the ZnSO<sub>4</sub>, AA/ZnSO<sub>4</sub>, and PAA/ZnSO<sub>4</sub> electrolytes at a fixed overpotential of -150 mV.



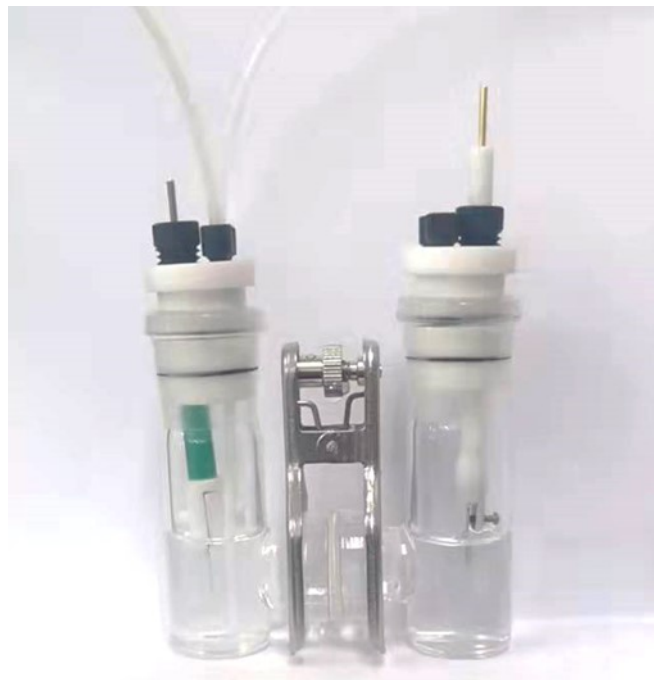

**Fig. S22.** Photo of in-situ electrochemical gas chromatography device.

Table S1. Comparison of the electrochemical performance of Zn anode in aqueous electrolytes with previous works.

| Main materials                                    | Current density and areal capacity                     | Cycle Time    | Reference <sup>a</sup> |
|---------------------------------------------------|--------------------------------------------------------|---------------|------------------------|
| <b>PAA</b>                                        | <b>1 mA·cm<sup>-2</sup>, 1 mAh·cm<sup>-2</sup></b>     | <b>2200 h</b> | <b>This work</b>       |
|                                                   | <b>2 mA·cm<sup>-2</sup>, 1 mAh·cm<sup>-2</sup></b>     | <b>1200 h</b> |                        |
|                                                   | <b>10 mA·cm<sup>-2</sup>, 1 mAh·cm<sup>-2</sup></b>    | <b>360 h</b>  |                        |
|                                                   | <b>5 mA·cm<sup>-2</sup>, 3 mAh·cm<sup>-2</sup></b>     | <b>300 h</b>  |                        |
| Zn <sub>88</sub> Al <sub>12</sub> alloy           | 0.5 mA·cm <sup>-2</sup> , 0.5 mAh·cm <sup>-2</sup>     | 2000 h        | [9]                    |
| Zn@ZnO                                            | 0.2 mA·cm <sup>-2</sup> , 0.2 mAh·cm <sup>-2</sup>     | 1000 h        | [12]                   |
|                                                   | 5 mA·cm <sup>-2</sup> , 2.5 mAh·cm <sup>-2</sup>       | 100 h         |                        |
| TiO <sub>2</sub>                                  | 1 mA·cm <sup>-2</sup> , 1 mAh·cm <sup>-2</sup>         | 460 h         | [32]                   |
| TiO <sub>2</sub> /PVDF                            | 0.885 mA·cm <sup>-2</sup> , 0.885 mAh·cm <sup>-2</sup> | 2000 h        | [33]                   |
| Acetonitrile                                      | 2 mA·cm <sup>-2</sup> , 1 mAh·cm <sup>-2</sup>         | 580 h         | [34]                   |
| MXene/ZnS                                         | 1 mA·cm <sup>-2</sup> , 1 mAh·cm <sup>-2</sup>         | 1100 h        | [35]                   |
|                                                   | 10 mA·cm <sup>-2</sup> , 1 mAh·cm <sup>-2</sup>        | 180 h         |                        |
| Functional<br>supramolecules                      | 1 mA·cm <sup>-2</sup> , 1 mAh·cm <sup>-2</sup>         | 2000 h        | [36]                   |
|                                                   | 5 mA·cm <sup>-2</sup> , 3 mAh·cm <sup>-2</sup>         | 250 h         |                        |
| Cyanoacrylate                                     | 0.5 mA·cm <sup>-2</sup> , 0.5 mAh·cm <sup>-2</sup>     | 800 h         | [37]                   |
| NaTi <sub>2</sub> (PO <sub>4</sub> ) <sub>3</sub> | 1 mA·cm <sup>-2</sup> , 1 mAh·cm <sup>-2</sup>         | 260 h         | [38]                   |
| Zn/CNT                                            | 2 mA·cm <sup>-2</sup> , 2 mAh·cm <sup>-2</sup>         | 200 h         | [39]                   |
|                                                   | 5 mA·cm <sup>-2</sup> , 2.5 mAh·cm <sup>-2</sup>       | 110 h         |                        |
| Zinc alginate gel                                 | 1.7 mA·cm <sup>-2</sup> , 0.885 mAh·cm <sup>-2</sup>   | 270 h         | [40]                   |
|                                                   | 8.8 mA·cm <sup>-2</sup> , 2.2 mAh·cm <sup>-2</sup>     | 200 h         |                        |
| Collagen<br>hydrolysate                           | 1 mA·cm <sup>-2</sup> , 1 mAh·cm <sup>-2</sup>         | 60 h          | [41]                   |
| Electrodeposition<br>Zn                           | 10 mA·cm <sup>-2</sup> , 1.8 mAh·cm <sup>-2</sup>      | 200 h         | [42]                   |
| MXene                                             | 0.2 mA·cm <sup>-2</sup> , 0.2 mAh·cm <sup>-2</sup>     | 800 h         | [43]                   |

<sup>a</sup>The reference numbers are same to those in the manuscript.

**Table S2. Element content and percentage of total N1s, C1s, Zn2p analyzed by XPS.**

|        | Element content % |     |      |      | % of total C1s |      |      | % of total N1s |      | % of total Zn2p |      |
|--------|-------------------|-----|------|------|----------------|------|------|----------------|------|-----------------|------|
|        | C                 | N   | O    | Zn   | C=O            | C-O  | C-C  | -NH-CO-        | N-Zn | Zn-O            | Zn   |
| PAA    | 33.4              | 3.2 | 63.4 | -    | 42.1           | 4.1  | 53.8 | 100            | -    | -               | -    |
| PAA/Zn | 54.1              | 2.4 | 35.6 | 7.8  | 18.9           | 15.2 | 65.9 | 12.8           | 87.2 | 89.1            | 10.9 |
| AA/Zn  | 62.7              | 2.0 | 24.9 | 10.4 | 14.9           | 16.6 | 68.5 | -              | -    | 82.0            | 18.0 |

## References

[S1] C. Huang; X. Zhao; S. Liu; Y. Hao; Q. Tang; A. Hu; Z. Liu; X. Chen, *Adv Mater* **2021**, *33*, e2100445.
